# Supplementary material
Source: ML conference proceedings conference paper supplement (https://openaccess.thecvf.com/content/CVPR2023/html/Zhang_Efficient_Map_Sparsification_CVPR_2023_paper.html)
Supplement: Supplementary file 1 [file Zhang_Efficient_Map_Sparsification_CVPR_2023_supplemental.pdf]

# Supplemental Material for Efficient Map Sparsification Based on 2D and 3D Discretized Grids

Xiaoyu Zhang      Yun-Hui Liu

T Stone Robotics Institute, Chinese University of Hong Kong  
Hong Kong Centre for Logistics Robotics

zhang.xy@link.cuhk.edu.hk

yhliu@mae.cuhk.edu.hk

## 1. Overview

In this supplemental material, we provide more experimental results and analysis. 1) We compare localization in original maps and compact maps, showing the superiority in memory consumption and localization efficiency for using compact maps. 2) We provide more experimental results of localizing different spatial distributed query images in compact maps acquired by different methods. 3) We provide more experimental results of run-time and memory consumption. 4) We provide more visualization of compact maps compared with original maps.

## 2. Localization in Compact Map

Compact maps are compared with original maps for localization. Several representative results are shown in Tab. 1, in which original maps contain various numbers of landmarks.

The most memory-consuming part in a map is the descriptors of landmarks. Therefore, as the number of landmarks decreases in compact maps, consumed memory is also reduced largely. Besides, localizing in compact maps becomes much faster than in original ones, since less landmarks are searched to match with features of query images. In sequence 02, for example, the compact map takes up only 3.13% of the memory compared with the original map, and the localization in the compact map runs more than 5 times faster.

This comparison demonstrates the superiority and benefits of using compact maps for localization, especially when an original map is very large.

## 3. Map Sparsification Based on 2D and 3D Grids

More experimental results of localizing different spatial distributed query images in compact maps are shown in Tab. 2. Compact maps are acquired by different map sparsification methods, including LP, QP1, and QP2. These

methods get comparable localization results with Ours-2D. Ours-3D still gets the highest localization rate for most testings because of involving 3D space constraints.

## 4. Comparison Experiments

More results of the comparison of different map sparsification methods in terms of run-time and memory consumption are provided in Tab. 3 and Tab. 4. The proposed method is much more efficient than QP.

## 5. Visualization

Compact and original maps are drawn in different colors in Fig. 1. Compared with original maps, the landmarks in compact maps are much more sparse and they spread throughout whole space, providing comparable localization results for query images.

Table 1. Comparison of localization in original and compact maps.  $N$  denotes the number of landmarks,  $S$  denotes the used memory for storing the map, and  $t$  denotes the average run-time for localizing a query image.

| Seq. | Original Map |       |          |          | Compact Map |       |          |          |
|------|--------------|-------|----------|----------|-------------|-------|----------|----------|
|      | $N$          | $N_k$ | $S$ (MB) | $t$ (ms) | $N$         | $N_k$ | $S$ (MB) | $t$ (ms) |
| liv0 | 4061         | 107   | 5.37     | 33.54    | 520         | 107   | 0.49     | 20.75    |
| off0 | 5875         | 133   | 11.08    | 48.19    | 398         | 133   | 0.69     | 24.01    |
| V103 | 11518        | 216   | 15.70    | 67.11    | 1141        | 216   | 0.96     | 43.48    |
| MH5  | 16956        | 369   | 29.45    | 89.83    | 1118        | 369   | 1.94     | 45.38    |
| 07   | 27036        | 258   | 34.55    | 115.95   | 1241        | 258   | 1.07     | 65.89    |
| 09   | 55984        | 603   | 80.44    | 172.88   | 2945        | 603   | 2.50     | 68.01    |
| 08   | 119323       | 1269  | 169.47   | 292.50   | 5902        | 1269  | 5.36     | 71.86    |
| 02   | 182499       | 1794  | 240.13   | 377.38   | 7661        | 1794  | 7.51     | 70.08    |

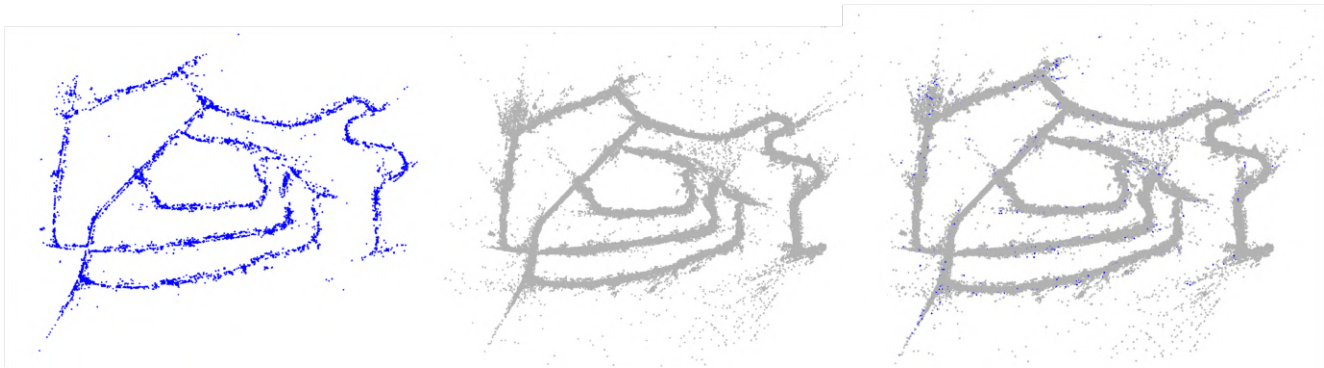

(a) Sequence 02

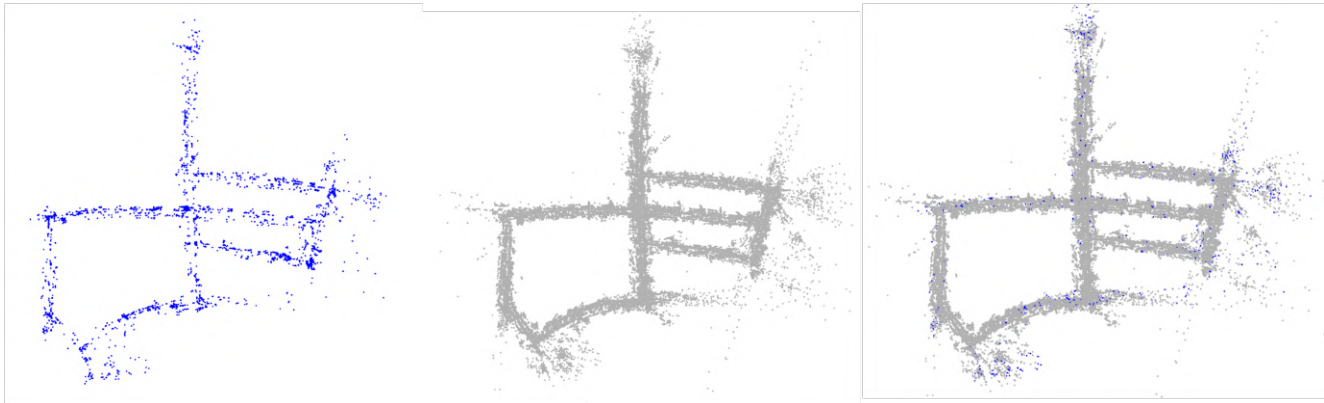

(b) Sequence 05

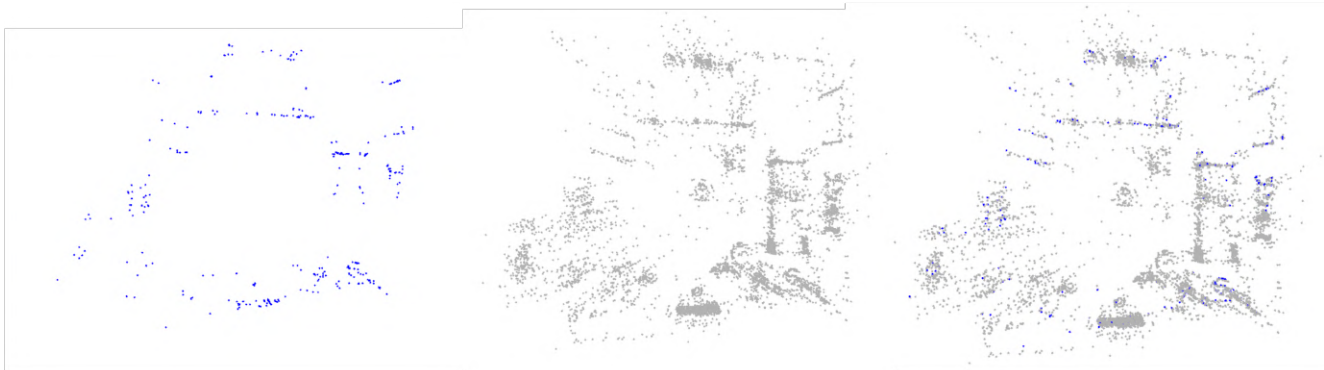

(c) Sequence liv2

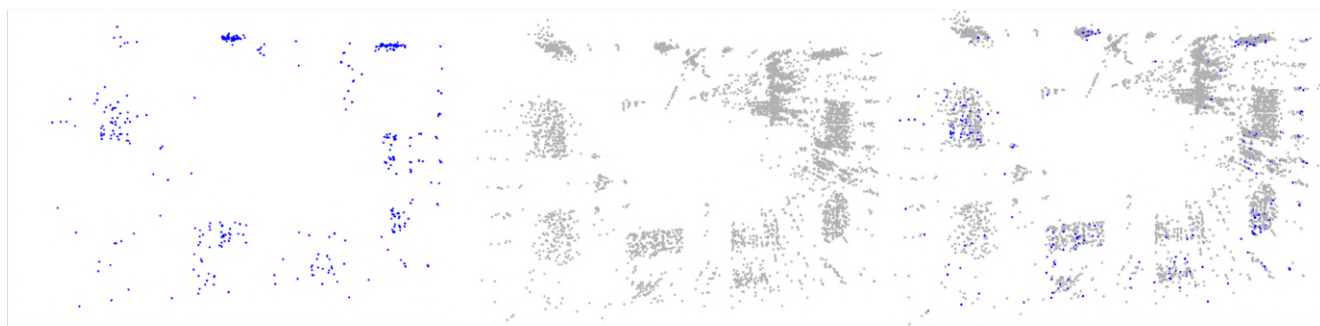

(d) Sequence off3

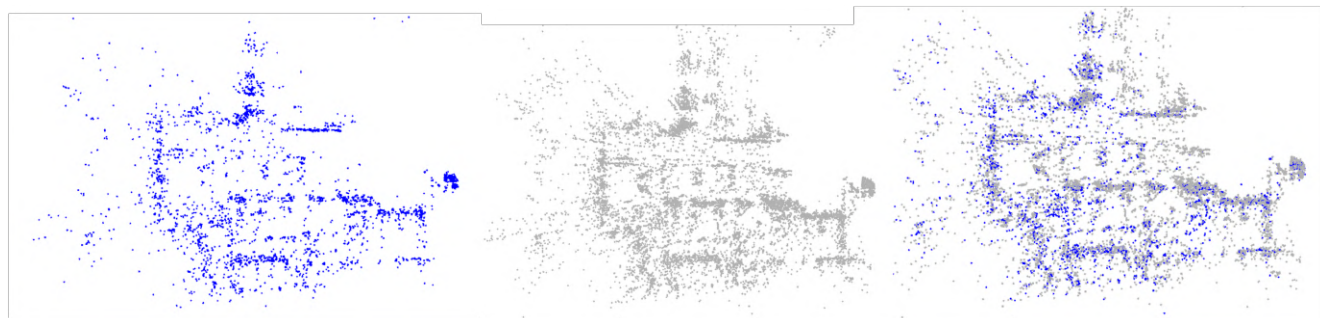

(e) Sequence MH1

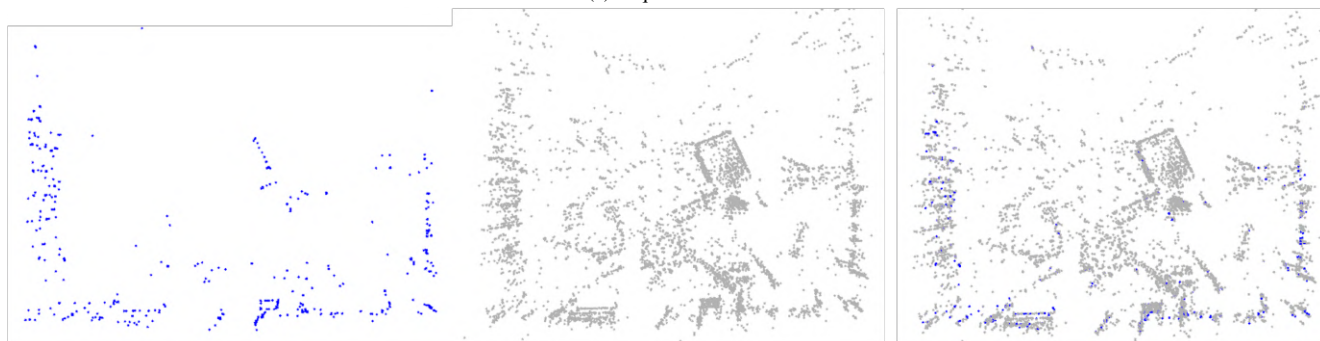

(f) Sequence V101

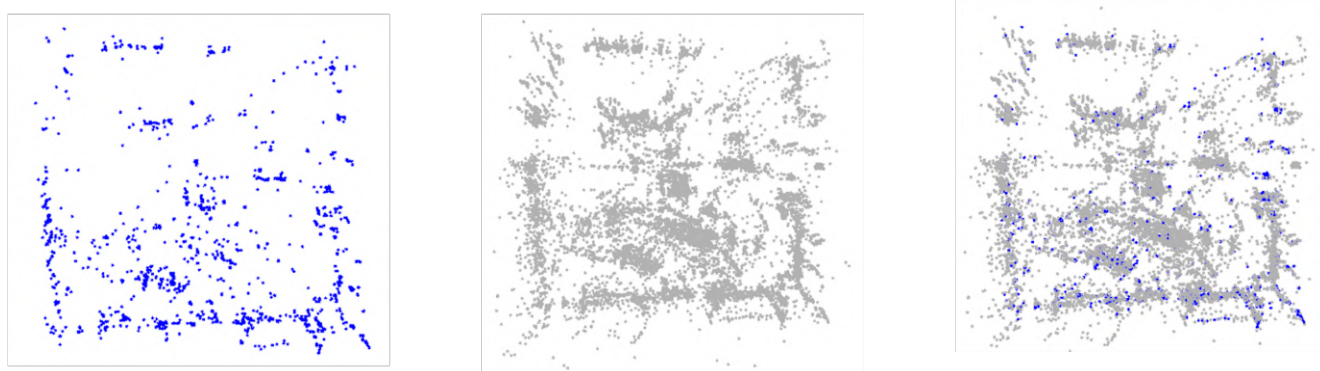

(g) Sequence V202

Figure 1. Illustration of compact and original maps. The first column shows compact maps in blue; the second column shows original maps in gray; and compact and original maps are drawn together in the third column.

Table 2. Comparison of different map sparsification methods in terms of localization rate. Num denotes the number of landmarks in the map, Rate denotes the localization rate in the corresponding map. The sequence for mapping is indicated in bold and the images from several different sequences are localized in the map. The highest localization rates in compact maps are labelled in bold.

|          |       | off0          |               |               | off2  |               |               | liv2  |               |               |
|----------|-------|---------------|---------------|---------------|-------|---------------|---------------|-------|---------------|---------------|
| Map      | Num   | off0          | Rate<br>off2  | off3          | Num   | Rate<br>off0  | off2          | Num   | Rate<br>liv1  | liv2          |
| Original | 5875  | 99.93%        | 66.70%        | 52.26%        | 6838  | 65.65%        | 100.00%       | 6435  | 55.80%        | 100.00%       |
| Ours-2D  | 398   | 95.62%        | 27.95%        | 7.74%         | 299   | 4.31%         | <b>92.27%</b> | 312   | 2.48%         | <b>91.36%</b> |
| Ours-3D  | 399   | 95.49%        | <b>28.52%</b> | <b>7.98%</b>  | 301   | <b>6.17%</b>  | 91.70%        | 314   | <b>4.04%</b>  | 90.68%        |
| LP       | 398   | 95.42%        | 27.50%        | 7.34%         | 298   | 4.38%         | 91.02%        | 310   | 3.93%         | 89.77%        |
| QP1      | 398   | <b>95.76%</b> | 27.27%        | 7.42%         | 298   | 3.51%         | 90.34%        | 310   | 3.00%         | 90.57%        |
| QP2      | 398   | <b>95.76%</b> | 28.18%        | 7.74%         | 298   | 3.38%         | 91.36%        | 310   | 2.59%         | 91.02%        |
|          |       | MH1           |               |               | MH4   |               |               | MH5   |               |               |
| Map      | Num   | MH1           | Rate<br>MH2   | MH3           | Num   | Rate<br>MH4   | MH5           | Num   | Rate<br>MH4   | MH5           |
| Original | 12506 | 99.04%        | 87.10%        | 52.53%        | 17490 | 99.69%        | 84.20%        | 16956 | 82.34%        | 99.77%        |
| Ours-2D  | 2978  | <b>97.33%</b> | 73.67%        | 45.76%        | 744   | <b>97.37%</b> | 63.77%        | 1116  | 74.75%        | <b>98.87%</b> |
| Ours-3D  | 2982  | 96.78%        | <b>73.97%</b> | <b>46.18%</b> | 745   | 97.06%        | <b>64.27%</b> | 1121  | <b>75.71%</b> | 98.74%        |
| LP       | 2976  | 97.03%        | 72.83%        | 46.10%        | 743   | 97.32%        | 63.46%        | 1116  | 74.75%        | 98.69%        |
| QP1      | 2976  | 96.76%        | 72.33%        | 45.57%        | 742   | 97.27%        | 63.19%        | 1116  | 72.20%        | 98.60%        |
| QP2      | 2977  | 96.54%        | 71.87%        | 45.72%        | 742   | 97.01%        | 64.04%        | 1116  | 74.14%        | 98.60%        |
|          |       | MH2           |               |               | V101  |               |               | V102  |               |               |
| Map      | Num   | MH1           | Rate<br>MH2   | MH3           | Num   | Rate<br>V101  | V102          | Num   | Rate<br>V101  | V102          |
| Original | 11306 | 91.78%        | 99.73%        | 51.81%        | 6864  | 99.03%        | 61.56%        | 9878  | 72.25%        | 98.12%        |
| Ours-2D  | 2546  | 74.80%        | 98.17%        | 35.50%        | 461   | 86.04%        | 32.60%        | 507   | 34.61%        | 85.93%        |
| Ours-3D  | 2550  | <b>77.41%</b> | 97.77%        | 38.69%        | 462   | 85.79%        | <b>34.61%</b> | 506   | <b>37.67%</b> | <b>85.99%</b> |
| LP       | 2544  | 75.57%        | 96.43%        | 37.86%        | 460   | 84.92%        | 32.35%        | 507   | 34.61%        | 84.86%        |
| QP1      | 2547  | 76.72%        | <b>98.33%</b> | <b>39.11%</b> | 461   | 85.52%        | 32.16%        | 506   | 34.16%        | 85.87%        |
| QP2      | 2547  | 76.81%        | 98.30%        | 38.62%        | 461   | <b>86.35%</b> | 32.66%        | 506   | 33.25%        | 85.49%        |
|          |       | MH3           |               |               | V201  |               |               | V202  |               |               |
| Map      | Num   | MH1           | Rate<br>MH2   | MH3           | Num   | Rate<br>V201  | V202          | Num   | Rate<br>V201  | V202          |
| Original | 15234 | 59.93%        | 52.80%        | 97.34%        | 7346  | 94.69%        | 52.77%        | 11791 | 75.22%        | 99.48%        |
| Ours-2D  | 2105  | 46.85%        | 37.23%        | 95.32%        | 565   | 79.64%        | 19.48%        | 1254  | 49.82%        | 93.25%        |
| Ours-3D  | 2108  | 46.94%        | <b>37.60%</b> | 95.25%        | 569   | <b>80.00%</b> | <b>22.77%</b> | 1256  | 50.04%        | <b>93.46%</b> |
| LP       | 2104  | <b>47.16%</b> | 37.30%        | 95.32%        | 564   | 78.75%        | 20.26%        | 1254  | <b>50.27%</b> | 92.86%        |
| QP1      | 2107  | 46.74%        | 36.90%        | <b>95.44%</b> | 564   | 78.62%        | 20.26%        | 1254  | 49.73%        | 93.07%        |
| QP2      | 2105  | 47.05%        | 37.37%        | 95.17%        | 564   | 78.97%        | 19.18%        | 1254  | 49.64%        | 93.42%        |

Table 3. Comparison of different map sparsification methods in terms of run-time.  $N$  denotes the number of landmarks,  $N_k$  denotes the number of keyframes.

| Seq. | Original Map |       | Run-time (s) |      |      |       |     |
|------|--------------|-------|--------------|------|------|-------|-----|
|      | $N$          | $N_k$ | Ours         | LP   | QP1  | QP2   | DI  |
| liv0 | 4.1K         | 107   | 0.2          | 0.1  | 13.6 | 12.5  | 0.2 |
| liv1 | 4.1K         | 49    | 0.2          | 0.1  | 16.2 | 14.7  | 0.1 |
| liv2 | 6.4K         | 78    | 0.3          | 0.1  | 66.0 | 22.4  | 0.2 |
| liv3 | 6.2K         | 121   | 0.3          | 0.1  | 28.9 | 21.6  | 0.2 |
| off0 | 5.9K         | 133   | 0.3          | 0.1  | 27.9 | 18.9  | 0.2 |
| off1 | 6.0K         | 46    | 0.1          | 0.1  | 29.7 | 25.7  | 0.1 |
| off2 | 6.8K         | 66    | 0.2          | 0.1  | 39.9 | 28.7  | 0.2 |
| off3 | 5.4K         | 37    | 0.1          | 0.1  | 49.5 | 39.3  | 0.1 |
| MH1  | 12.5K        | 483   | 1.0          | 0.3  | 49.6 | 25.5  | 0.6 |
| MH2  | 11.3K        | 428   | 1.0          | 0.3  | 42.8 | 29.3  | 0.6 |
| MH3  | 15.2K        | 468   | 1.6          | 0.5  | 78.5 | 52.2  | 1.1 |
| MH4  | 17.5K        | 314   | 10.0         | 7.1  | 127  | 182   | 1.4 |
| MH5  | 17.0K        | 369   | 4.5          | 2.2  | 107  | 61.5  | 1.2 |
| V101 | 6.9K         | 107   | 1.1          | 0.2  | 20.9 | 16.9  | 0.3 |
| V102 | 9.9K         | 148   | 0.8          | 0.3  | 49.4 | 31.1  | 0.4 |
| V103 | 11.5K        | 216   | 1.1          | 0.3  | 59.8 | 36.3  | 0.6 |
| V201 | 7.3K         | 109   | 0.3          | 0.1  | 30.3 | 20.8  | 0.3 |
| V202 | 11.8K        | 273   | 2.6          | 1.3  | 56.6 | 31.8  | 0.6 |
| V203 | 14.6K        | 294   | 0.8          | 0.2  | 41.8 | 31.7  | 0.9 |
| 00   | 142K         | 1458  | 157          | 169  | -    | -     | 9.9 |
| 01   | 89.4K        | 1064  | 16.9         | 30.6 | -    | -     | 5.5 |
| 02   | 182K         | 1794  | 69.6         | 63.2 | -    | -     | 7.9 |
| 03   | 24.3K        | 217   | 2.6          | 1.1  | 110  | 71.5  | 0.6 |
| 04   | 16.8K        | 163   | 2.4          | 2.6  | 89.8 | 143   | 0.6 |
| 05   | 74.2K        | 758   | 65.9         | 45.7 | -    | -     | 3.2 |
| 06   | 42.5K        | 492   | 10.9         | 27.5 | 376  | 395   | 2.2 |
| 07   | 27.0K        | 258   | 2.6          | 1.1  | 127  | 95.5  | 0.7 |
| 08   | 119K         | 1269  | 33.2         | 19.2 | -    | -     | 4.9 |
| 09   | 56.0K        | 603   | 7.7          | 9.9  | 754  | 491   | 1.8 |
| 10   | 30.9K        | 346   | 3.3          | 1.3  | 94.4 | 143.2 | 0.9 |

Table 4. Comparison of different map sparsification methods in terms of memory consumption.  $N$  denotes the number of landmarks,  $N_k$  denotes the number of keyframes.

| Seq. | Original Map |       | Consumed Memory (MB) |      |       |       |      |
|------|--------------|-------|----------------------|------|-------|-------|------|
|      | $N$          | $N_k$ | Ours                 | LP   | QP1   | QP2   | DI   |
| liv0 | 4.1K         | 107   | 35                   | 14   | 555   | 476   | 33   |
| liv1 | 4.1K         | 49    | 66                   | 27   | 755   | 971   | 31   |
| liv2 | 6.4K         | 78    | 52                   | 24   | 2286  | 770   | 26   |
| liv3 | 6.2K         | 121   | 73                   | 14   | 1061  | 754   | 37   |
| off0 | 5.9K         | 133   | 61                   | 27   | 842   | 708   | 21   |
| off1 | 6.0K         | 46    | 33                   | 11   | 1718  | 1697  | 19   |
| off2 | 6.8K         | 66    | 87                   | 25   | 1387  | 857   | 40   |
| off3 | 5.4K         | 37    | 19                   | 12   | 1065  | 1158  | 31   |
| MH1  | 12.5K        | 483   | 115                  | 63   | 1612  | 862   | 64   |
| MH2  | 11.3K        | 428   | 116                  | 40   | 1573  | 899   | 49   |
| MH3  | 15.2K        | 468   | 129                  | 37   | 2226  | 1418  | 74   |
| MH4  | 17.5K        | 314   | 391                  | 193  | 6097  | 4624  | 130  |
| MH5  | 17.0K        | 369   | 255                  | 107  | 3532  | 1656  | 77   |
| V101 | 6.9K         | 107   | 92                   | 36   | 1338  | 662   | 21   |
| V102 | 9.9K         | 148   | 126                  | 56   | 1901  | 1065  | 27   |
| V103 | 11.5K        | 216   | 128                  | 56   | 3048  | 1367  | 83   |
| V201 | 7.3K         | 109   | 97                   | 55   | 1774  | 754   | 28   |
| V202 | 11.8K        | 273   | 174                  | 81   | 2964  | 1180  | 80   |
| V203 | 14.6K        | 294   | 138                  | 66   | 2080  | 1294  | 52   |
| 00   | 142K         | 1458  | 2404                 | 818  | -     | -     | 726  |
| 01   | 89.4K        | 1064  | 2046                 | 778  | -     | -     | 567  |
| 02   | 182K         | 1794  | 3494                 | 1502 | -     | -     | 1187 |
| 03   | 24.3K        | 217   | 338                  | 97   | 5131  | 3218  | 58   |
| 04   | 16.8K        | 163   | 279                  | 66   | 3906  | 2957  | 93   |
| 05   | 74.2K        | 758   | 436                  | 363  | -     | -     | 274  |
| 06   | 42.5K        | 492   | 732                  | 208  | 14527 | 4812  | 234  |
| 07   | 27.0K        | 258   | 141                  | 62   | 6315  | 5766  | 100  |
| 08   | 119K         | 1269  | 1162                 | 637  | -     | -     | 512  |
| 09   | 56.0K        | 603   | 676                  | 230  | 13005 | 10952 | 211  |
| 10   | 30.9K        | 346   | 355                  | 113  | 7027  | 2989  | 92   |
